# Supplementary material for: Heterogeneity in coronary heart disease risk
Source: PubMed Central journal article supplement (PMC9203574; doi:10.1038/s41598-022-14013-3), 2022-06-16
Supplement: 41598_2022_14013_MOESM1_ESM.pdf [file 41598_2022_14013_MOESM1_ESM.pdf]

# Appendix to: Heterogeneity in Coronary Heart Disease Risk

Cristoforo Simonetto, Susanne Rospleszcz, Jan Christian Kaiser, Kyoji Furukawa

The existence of latent factors  $L$  has impact on the age dependence of observed survival and hazard functions

(1). To study this impact, we explicitly write the dependence of the conditional hazard  $\lambda$  on age  $a$  and observed risk factors  $r$ :

$$\lambda(a, r|L) = \lambda(a, r) e^L$$

The corresponding conditional survival is given by

$$S(a, r|L) = \exp\left(-e^L \int_0^a \lambda(t, r) dt\right) \quad (\text{Eq. A.1})$$

Survival is reduced for large cumulative  $\lambda(a, r)$  and for large frailty  $e^L$ . For given age and observed risk factors, individual differences in survival are stronger for broad distribution of the frailty  $e^L$ . The depletion of high-risk individuals is reflected in the marginal hazard by inclusion of the conditional survival in the expectation value:

$$\bar{\lambda}(a, r) = \frac{E[\lambda(a, r|L) S(a, r|L)]}{E[S(a, r|L)]} = \lambda(a, r) \frac{E[\exp(L) S(a, r|L)]}{E[S(a, r|L)]} \quad (\text{Eq. A.2})$$

As the contribution of individuals with high frailty  $e^L$  diminishes, the marginal hazard attenuates with age, i.e.

$\bar{\lambda}(a, r)/\lambda(a, r)$  decreases with age. The attenuation is stronger for larger  $\lambda$ , see Eq. A.1. Therefore, also HRs comparing different levels of risk factors  $r_1, r_2$ , attenuate:

$$\frac{\bar{\lambda}(a, r_1)}{\bar{\lambda}(a, r_2)} = \frac{\lambda(a, r_1) E[\exp(L) S(a, r_1|L)] E[S(a, r_2|L)]}{\lambda(a, r_2) E[\exp(L) S(a, r_2|L)] E[S(a, r_1|L)]} \quad (\text{Eq. A.3})$$

This means for  $\frac{\bar{\lambda}(a, r_1)}{\bar{\lambda}(a, r_2)} > 1$ , this fraction to become smaller than  $\frac{\lambda(a, r_1)}{\lambda(a, r_2)}$  with advancing age. The conditional HR

$\lambda(a, r_1)/\lambda(a, r_2)$  represents the HR for two individuals that differ only in the level  $r_1$  vs.  $r_2$  of some risk factor(s).

In contrast, the marginal HR applies to groups with levels  $r_1$  vs.  $r_2$ . Because hazards cannot be determined for individuals, only the marginal hazard and the marginal HR can directly be deduced from incidence data.

## References

1. Balan TA, Putter H. A tutorial on frailty models. Stat Methods Med Res. 2020;29(11):3424-54.
